# Supplementary material for: Colorimetric hydrogen peroxide and glucose sensors based on the destruction of micelle-protected iron(ii) complex probes
Source: Royal Society of Chemistry journal article supplement (doi:10.1039/d3nj01008b), 2023-01-01
Supplement: d3nj01008b1.pdf [file d3nj01008b1.pdf]

## *Supplementary Information*

### **Colorimetric hydrogen peroxide and glucose sensors based on the destruction of micelle-protected iron (II) complex probes**

Tawatchai Kangkamano <sup>a\*</sup>, Warakorn Witsapan <sup>a</sup>, Apon Numnuam <sup>b</sup>, Jas Raj Subba <sup>c</sup> and Titilope John Jayeoye <sup>d</sup>

<sup>a</sup> *Department of Chemistry, Faculty of Science, Thaksin University, Phatthalung Campus, Papayom, Phatthalung 93110, Thailand*

<sup>b</sup> *Department of Chemistry, Faculty of Science, Prince of Songkla University 90110, Hat Yai, Songkhla, Thailand*

<sup>c</sup> *Department of Physical Science, Sherubtse College, Royal University of Bhutan, Trashigang, Bhutan*

<sup>d</sup> *Department of Chemistry, Faculty of Physical Sciences, Federal University Ndufu-Alike Ikwo, Abakaliki, Ebonyi State, Nigeria*

*\* Corresponding author at: Department of Chemistry, Faculty of Science, Thaksin University, Phatthalung Campus, Papayom, Phatthalung, 93110, Thailand*

*Tel.: +66 74 609607; fax: +66 74 609607*

*E-mail address: tkangkamano@yahoo.com (T. Kangkamano).*

**Fig. S1** The effect of thiocyanate concentration for complexing  $\text{Fe}^{3+}$  ions to form  $[\text{FeSCN}]^{2+}$  towards analyte ( $\text{H}_2\text{O}_2$ ) sensing based on the Fenton reaction. Condition:  $\text{H}_2\text{O}_2$  (5.0 mM in final volume of 1.0 mL),  $\text{Fe}^{2+}$  (0.10 M), Dz (1.0 mM), TX-114 (0.1 % v/v), incubation time (5 min).

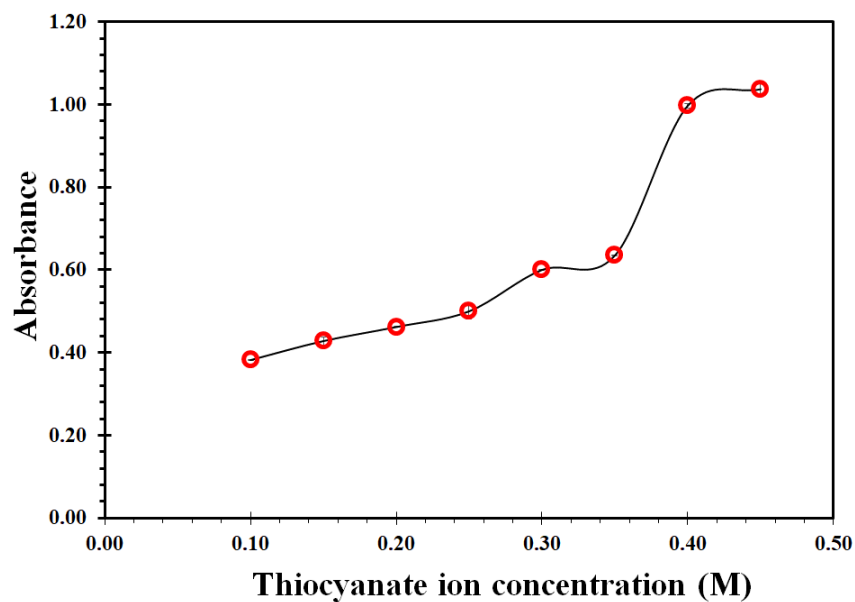

**Fig. S2** The effect of the reaction time considered from  $\text{H}_2\text{O}_2$  injection on micelle probes ( $\text{Fe}^{2+}$ -Dz-TX-114) until  $[\text{FeSCN}]^{2+}$  color development for spectrophotometric measurement, by absorbance signal.

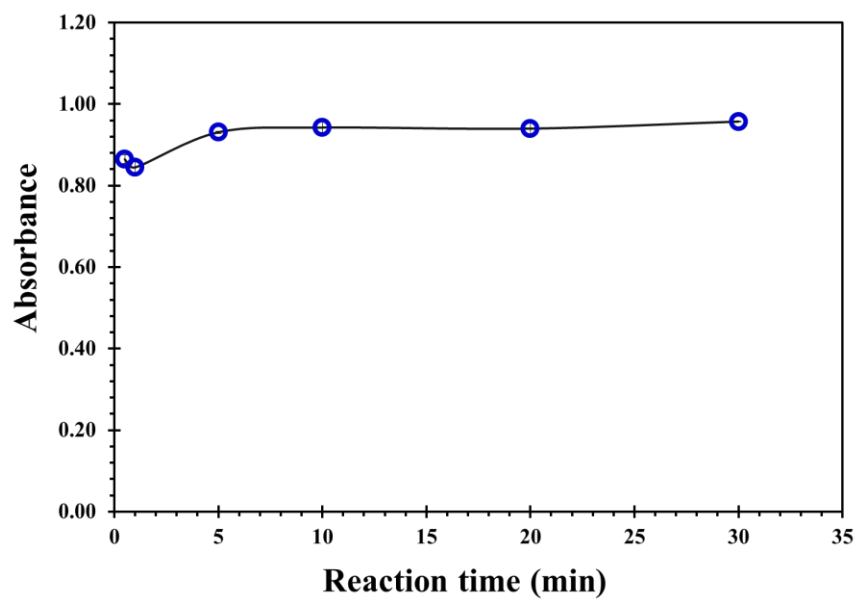

**Fig. S3** (A) The signals obtained from five measurement of H<sub>2</sub>O<sub>2</sub> (0.050, 0.50, 1.0, 2.0 and 4.0 mM) by one sensor and (B) the signals obtained from five of the developed sensors toward different H<sub>2</sub>O<sub>2</sub> concentrations (0.050, 0.50, 1.0 and 2.0 mM).

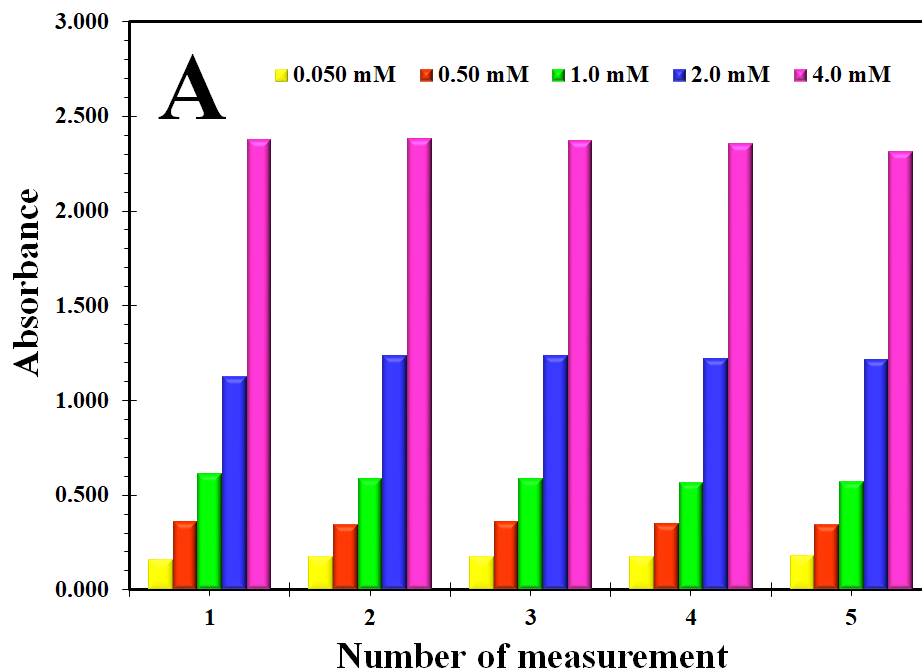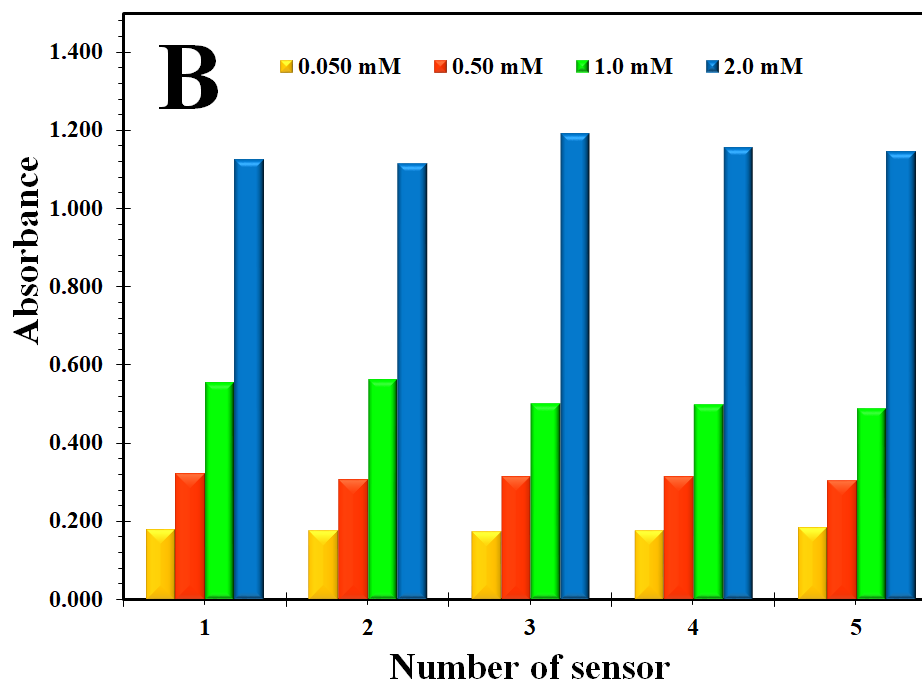

**Fig. S4** (A) The signals obtained from six measurement of glucose (0.050 and 1.0 mM) by one sensor and (B) the signals obtained from six of the developed sensors toward different glucose concentrations (0.050 and 1.0 mM).

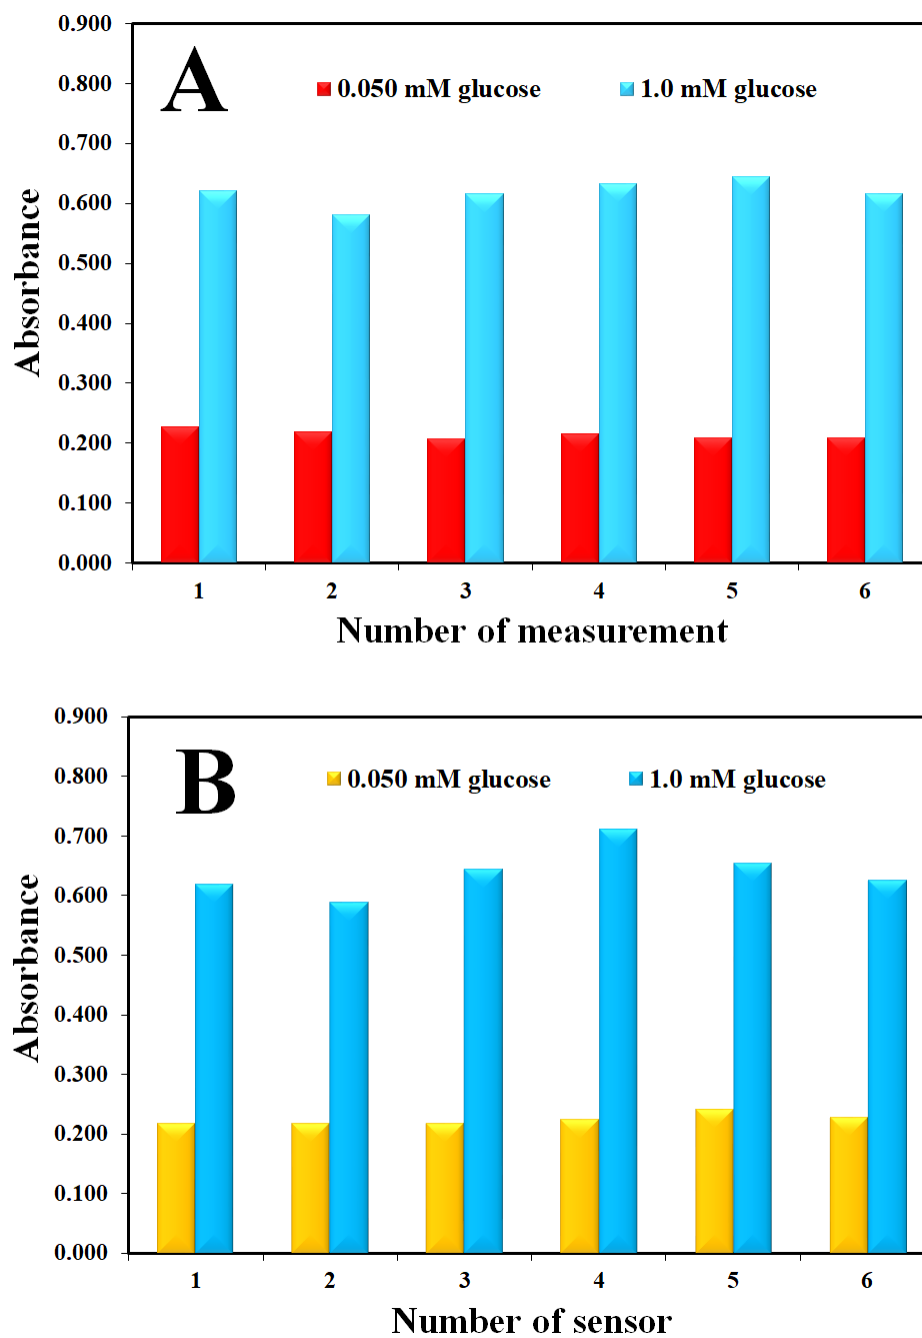

**Fig. S5** Quantification of glucose concentration in human blood plasma of (A) sample 1, (B) sample 2 and (C) sample 3. Inset: photographs of the colored solutions of  $\text{Fe}^{2+}$ -Dz-TX-114 micelles after solution of GOx mixed with samples and were spiked with different concentrations of glucose standard solution and  $\text{SCN}^-$  (0.40 M). Condition: glucose added 0.0, 0.050, 1.0, 2.0 and 4.0 mM in final volume of 1.0 mL; GOx (10 mg/mL);  $\text{Fe}^{2+}$  (0.10 M); Dz (1.0 mM); TX-114 (0.1 % v/v); incubation time in enzyme system (30 min); incubation time in spectrophotometric measurement system (5 min). All samples were diluted 200 times in final volume before measuring.

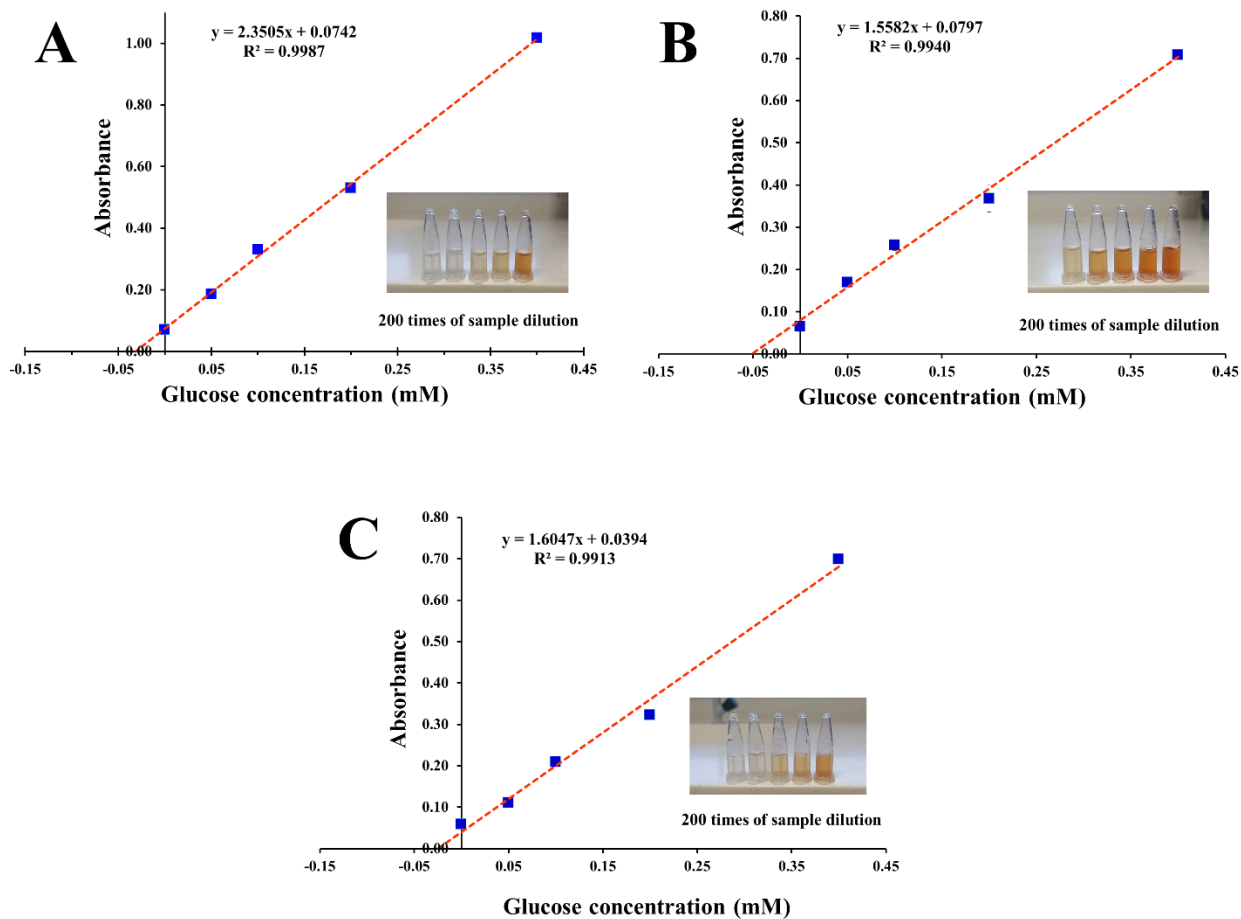

**Table S1.** Results of glucose determination in spiked plasma samples using the developed sensor.

| Sample | Added (mM) | Found ( $\mu\text{M}$ ) | Recovery (%) | RSD (%) |
|--------|------------|-------------------------|--------------|---------|
| 1      | 0.050      | 0.049 $\pm$ 0.004       | 97.9         | 8.5     |
| 2      | 0.100      | 0.111 $\pm$ 0.006       | 104.1        | 5.0     |
| 3      | 0.200      | 0.195 $\pm$ 0.002       | 97.7         | 0.8     |
| 4      | 0.400      | 0.403 $\pm$ 0.003       | 100.7        | 0.7     |
